# Supplementary material for: Life’s Crucial 9 Score Demonstrates a Dose-Response Relationship with Reduced Risk of Benign Prostatic Hyperplasia: A UK Biobank Cohort Study
Source: Research Square preprint supplement (doi:10.21203/rs.3.rs-6270616/v1), 2025-04-01
Supplement: Supplementary file 1 [file ddd61423f1ee6b5484a09fa2.docx]

**Table S1. Scoring criteria of diet in UK Biobank to the DASH-style diet score.**

| **Dietary criteria** | **Component** | **Definition/fields** | **Foods** | **Property of variable** | **Scoring Criteria** | **Note** |
| --- | --- | --- | --- | --- | --- | --- |
| Modified diet score in UK biobank | Fruits | 1309; 1319 | All fresh fruits and dry fruits | Continuous | >median of the whole population | 1: If scoring condition met;  0: If scoring condition not met (Range: 0–9) |
| 1558; 1299 | All raw and cooked vegetables |
| Red meat | 1369; 1379; 1389; 1349 | Beef, lamb, pork and processed meat | Categorical | <median times of the whole population |
| Fish | 1329 | All oily fish and | Categorical | >median times of the whole population |
| 1339 | non-oily fish |
| Cereal | 1458; 1468 | All cereal | Continuous | >median of the whole population |
| Chicken | 1359 | Chicken | Categorical | <median times of the whole population |
| Cheese | 1408 | All cheese | Categorical | ≤4 times per week |
| Butter | 1428 | All butter | Categorical | Not using butter as spread |
| Alcohol | 1558 | All kinds of alcohol | Continuous | Less than once a day |

For categorical variables, the middle value of consumption frequency was taken at the time of calculation, with “Never” as 0 time a week; “less than once a week” as 0.5 time a week; “once a week” as 1 time a week; “2-4 times a week” as 3 times a week; “5-6 times a week” as 5.5 times a week; “once or more daily” as 7 times a week; “do not know” and “prefer not to answer” as missing values. The sum consumption frequency of each food component was calculated and the median value of consumption frequency in population was considered as score cutoff point. US, United States; UK, United Kingdom; DASH, dietary approaches to stop hypertension

**Table S2. Definition of CVH metrics and scoring algorithm in UK Biobank.**

| **Domain** | **CVH metric** | **Method of measurement** | **Quantification of CVH metric** | |
| --- | --- | --- | --- | --- |
| **Health behaviors** | **Diet** | Measurement: | **Points:** | **Modified/Original DASH score** |
| Self-reported daily intake of a DASH-style eating pattern modified according to available diet variables in UK Biobank | 100 | 95th percentile (top/ideal diet) |
| 80 | 75th–94th percentile |
| 50 | 50th–74th percentile |
| 25 | 25th–49th percentile |
| 0 | 1st–24th percentile (bottom/least ideal quartile) |
| **Physical activity** | Self-reported minutes of moderate or vigorous physical activity per week | **Points:** | **Minutes:** |
| 100 | ≥150 |
| 90 | 120–149 |
| 80 | 90–119 |
| 60 | 60–89 |
| 40 | 30–59 |
| 20 | 1–29 |
| 0 | 0 |
| **Nicotine exposure** | Self-reported smoking status | **Points:** | **Smoking status:** |
| 100 | Never smoker |
| 50 | Previous smoker |
| 0 | Current smoker |
| Subtract 20 points (unless score is 0) for living with active indoor smoker in home | |
| **Sleep health** | Self-reported average hours of sleep per night | **Points:** | **Level (hours)** |
| 100 | 7–<9 |
| 90 | 9–<10 |
| 70 | 6–<7 |
| 40 | 5–<6 or ≥10 |
| 20 | 4–<5 |
| 0 | <4 |
| **Health factors** | **BMI** | Body weight (kilograms) divided by height squared (meters squared) | **Points:** | **BMI (kg/m2)** |
| 100 | <25 |
| 70 | 25.0–29.9 |
| 30 | 30.0–34.9 |
| 15 | 35.0–39.9 |
| 0 | ≥40.0 |
| **Blood lipids** | Plasma total and HDL cholesterol with calculation of non–HDL cholesterol | **Points:** | **Non–HDL cholesterol (mg/dL)** |
| 100 | <130 |
| 60 | 130–159 |
| 40 | 160–189 |
| 20 | 190–219 |
| 0 | ≥220 |
| If drug-treated level, subtract 20 points (unless score is 0) | |
| **Blood glucose** | HbA1c (%) | **Points:** | **Level:** |
| 100 | No history of T2D and HbA1c <5.7 |
| 60 | No T2D and HbA1c 5.7–6.4 (prediabetes) |
| 40 | T2D with HbA1c <7.0 |
| 30 | T2D with HbA1c 7.0–7.9 |
| 20 | T2D with HbA1c 8.0–8.9 |
| 10 | T2D with HbA1c 9.0–9.9 |
| 0 | T2D with HbA1c ≥10.0 |
| **Blood pressure** | Appropriately measured systolic and diastolic blood pressures | Points: | Systolic and diastolic BPs (mmHg) |
| 100 | <120/<80 (optimal) |
| 75 | 120–129/<80 (elevated) |
| 50 | 130–139 or 80–89 (stage 1 hypertension) |
| 25 | 140–159 or 90–99 |
| 0 | ≥160 or ≥100 |
| If drug-treated level, subtract 20 points (unless score is 0) | |

CVH, cardiovascular health; DASH, dietary approaches to stop hypertension; US, United States; UK, United Kingdom; BMI, body mass index; HDL, high density lipoprotein; T2D, type 2 diabetes; BP, blood pressure.

***Table S3. Subgroup analysis between LC9 score and PCa. All presented covariates were adjusted (as in Model 3) except the stratification variable itself.***

| **Variable** | **Count** | **Percent** | **OR** | **Lower** | **Upper** | **P value** | **P for interaction** |
| --- | --- | --- | --- | --- | --- | --- | --- |
| Age |  |  |  |  |  |  | 0.355 |
| 60 or above | 10290 | 40.1 | 0.994 | 0.986 | 1.003 | 0.194 |  |
| less than 60 | 15366 | 59.9 | 1.003 | 0.993 | 1.012 | 0.587 |  |
| Race |  |  |  |  |  |  | 0.54 |
| ASIAN OR ASIAN BRITSH | 241 | 0.9 | 0.977 | 0.854 | 1.119 | 0.738 |  |
| BLACK OR BLACK BRITSH | 124 | 0.5 | 1.006 | 0.942 | 1.073 | 0.867 |  |
| CHINESE | 31 | 0.1 | - | - | - | - |  |
| MIXED | 90 | 0.4 | 0.838 | 0.585 | 1.202 | 0.338 |  |
| Other ethnic group | 114 | 0.4 | 0.978 | 0.877 | 1.09 | 0.684 |  |
| WHITE | 25056 | 97.7 | 0.998 | 0.992 | 1.005 | 0.636 |  |
| Townsend Deprivation Index |  |  |  |  |  |  | 0.338 |
| Q1 | 8505 | 33.2 | 0.997 | 0.985 | 1.008 | 0.545 |  |
| Q2 | 8447 | 32.9 | 0.995 | 0.984 | 1.005 | 0.327 |  |
| Q3 | 8704 | 33.9 | 1.001 | 0.99 | 1.011 | 0.905 |  |
| Qualifications |  |  |  |  |  |  | 0.226 |
| college or above | 13370 | 52.1 | 1.003 | 0.993 | 1.013 | 0.535 |  |
| high school | 3479 | 13.6 | 1.008 | 0.99 | 1.026 | 0.396 |  |
| less than high school | 8807 | 34.3 | 0.99 | 0.98 | 0.999 | 0.031 |  |
| BMI |  |  |  |  |  |  | 0.033 |
| low | 39 | 0.2 | - | - | - | - |  |
| normal | 4751 | 18.5 | 1.019 | 1.001 | 1.037 | 0.042 |  |
| obesity | 5074 | 19.8 | 0.996 | 0.983 | 1.009 | 0.53 |  |
| overweight | 15792 | 61.6 | 0.993 | 0.985 | 1.001 | 0.088 |  |
| Alcohol consumption |  |  |  |  |  |  | 0.242 |
| Current | 24721 | 96.4 | 0.999 | 0.992 | 1.005 | 0.655 |  |
| Never | 384 | 1.5 | 0.981 | 0.941 | 1.023 | 0.364 |  |
| Previous | 551 | 2.1 | 0.996 | 0.961 | 1.033 | 0.841 |  |
| Hypertension |  |  |  |  |  |  | 0.627 |
| No | 19269 | 75.1 | 0.999 | 0.991 | 1.007 | 0.838 |  |
| Yes | 6387 | 24.9 | 0.997 | 0.987 | 1.008 | 0.615 |  |
| Diabetes |  |  |  |  |  |  | 0.341 |
| No | 24537 | 95.6 | 0.999 | 0.992 | 1.006 | 0.766 |  |
| Yes | 1119 | 4.4 | 0.984 | 0.962 | 1.006 | 0.162 |  |
| CVD |  |  |  |  |  |  | 0.972 |
| No | 24316 | 94.8 | 0.998 | 0.992 | 1.005 | 0.616 |  |
| Yes | 1340 | 5.2 | 0.996 | 0.975 | 1.018 | 0.716 |  |
